# Supplementary material for: Quercetin Inhibits the Proliferation and Aflatoxins Biosynthesis of Aspergillus flavus
Source: MDPI journal article supplement (doi:10.3390/toxins11030154), 2019-03-09
Supplement: s1 [file s1]

# Supplementary Materials: Quercetin Inhibits the Proliferation and Aflatoxins Biosynthesis of *Aspergillus flavus*

Xiu-Mei Li, Zhong-Yuan Li, Ya-Dong Wang, Jin-Quan Wang and Pei-Long Yang

**Table S1.** Summary of Transcriptome Sequencing Data.

| Analysis items            | Count (Million) |          | Proportion (%) |        |
|---------------------------|-----------------|----------|----------------|--------|
|                           | CK              | QT       | CK             | QT     |
| <b>No. of clean reads</b> |                 |          |                |        |
| Total clean reads         | 50561156        | 51441686 | \              | \      |
| Q30                       | \               | \        | 91.46          | 91.69  |
| GC content                | \               | \        | 52.33          | 52.39  |
| <b>Mapping to genome</b>  |                 |          |                |        |
| Mapped reads              | 45577031        | 46843066 | 90.14%         | 89.88% |
| Uniquely mapped reads     | 45342143        | 45999155 | 89.68%         | 89.42% |
| Multi-mapped reads        | 234888          | 236632   | 0.46%          | 0.46%  |

**Table S3.** GO Ontology (GO) functional enrichment analysis of different expressed genes when *A.flavus* was treated with quercetin.

| GO ID      | Gene Ontology Term                                      | q Value  | List Hits | List Size |
|------------|---------------------------------------------------------|----------|-----------|-----------|
| GO:0003735 | structural constituent of ribosome                      | 1.53e-48 | 63        | 339       |
| GO:0005198 | structural molecule activity                            | 4.24e-42 | 63        | 339       |
| GO:0009055 | electron carrier activity                               | 0.02828  | 8         | 339       |
| GO:0019843 | rRNA binding                                            | 0.03596  | 4         | 339       |
| GO:0003755 | cis-trans isomerase activity                            | 0.04628  | 6         | 339       |
| GO:0006412 | translation                                             | 9.72e-39 | 75        | 347       |
| GO:0044267 | cellular protein metabolic process                      | 7.27e-21 | 91        | 347       |
| GO:0019538 | protein metabolic process                               | 5.62e-16 | 96        | 347       |
| GO:0044249 | cellular biosynthetic process                           | 5.68e-12 | 116       | 347       |
| GO:0009058 | biosynthetic process                                    | 5.80e-12 | 124       | 347       |
| GO:1901576 | organic substance biosynthetic process                  | 1.26e-11 | 117       | 347       |
| GO:0044237 | cellular metabolic process                              | 3.37e-09 | 181       | 347       |
| GO:0034645 | cellular macromolecule biosynthetic process             | 2.94e-08 | 81        | 347       |
| GO:0010467 | gene expression                                         | 7.77e-08 | 83        | 347       |
| GO:0009059 | macromolecule biosynthetic process                      | 7.81e-08 | 81        | 347       |
| GO:0071704 | organic substance metabolic process                     | 6.01e-05 | 186       | 347       |
| GO:0044238 | primary metabolic process                               | 0.00013  | 175       | 347       |
| GO:0044260 | cellular macromolecule metabolic process                | 0.00061  | 107       | 347       |
| GO:0009987 | cellular process                                        | 0.00863  | 211       | 347       |
| GO:1901566 | organonitrogen compound biosynthetic process            | 0.00952  | 30        | 347       |
| GO:0009145 | purine nucleoside triphosphate biosynthetic process     | 0.02823  | 6         | 347       |
| GO:0009152 | purine ribonucleoside triphosphate biosynthetic process | 0.02823  | 6         | 347       |
| GO:0005840 | ribosome                                                | 9.72e-39 | 66        | 172       |
| GO:0030529 | ribonucleoprotein complex                               | 7.27e-21 | 75        | 172       |
| GO:0043228 | non-membrane-bounded organelle                          | 1.62e-31 | 73        | 172       |
| GO:0043232 | intracellular non-membrane-bounded organelle            | 1.62e-31 | 73        | 172       |
| GO:0044444 | cytoplasmic part                                        | 3.98e-29 | 86        | 172       |
| GO:0032991 | macromolecular complex                                  | 2.91e-25 | 93        | 172       |
| GO:0005737 | cytoplasm                                               | 4.54e-24 | 97        | 172       |
| GO:0005623 | cell                                                    | 1.37e-09 | 133       | 172       |
| GO:0044464 | cell part                                               | 1.37e-09 | 133       | 172       |

| GO ID      | Gene Ontology Term                       | q Value  | List Hits | List Size |
|------------|------------------------------------------|----------|-----------|-----------|
| GO:0044424 | intracellular part                       | 2.74e-08 | 124       | 172       |
| GO:0005622 | intracellular                            | 9.83e-08 | 126       | 172       |
| GO:0043226 | organelle                                | 2.17e-07 | 105       | 172       |
| GO:0043229 | intracellular organelle                  | 2.17e-07 | 105       | 172       |
| GO:0044391 | ribosomal subunit                        | 4.90e-06 | 11        | 172       |
| GO:0015935 | small ribosomal subunit                  | 0.00051  | 7         | 172       |
| GO:0016469 | proton-transporting ATP synthase complex | 0.01866  | 5         | 172       |

**Table S4.** KEGG metabolic pathway enrichment analysis of differentially expressed genes when *A. flavus* was treated with quercetin.

| ID       | Molecular Function        | p Value      | q Value      | List Hits | List Size |
|----------|---------------------------|--------------|--------------|-----------|-----------|
| Afv03010 | Ribosome                  | 5.971495e-55 | 1.009183e-52 | 70        | 318       |
| Afv00190 | Oxidative phosphorylation | 2.225421e-06 | 1.880481e-04 | 20        | 318       |
| Afv05016 | Huntington's disease      | 7.707923e-06 | 4.342130e-04 | 18        | 318       |
| Afv05012 | Parkinson's disease       | 1.362634e-05 | 5.757129e-04 | 15        | 318       |
| Afv05010 | Alzheimer's disease       | 4.953394e-05 | 1.674247e-03 | 15        | 318       |

**Table S5.** Primers used for RT-PCR.

| Target Gene     | Primer Name | Sequence (5'→3')         |
|-----------------|-------------|--------------------------|
| aflS            | F           | CGTCTATCAACAGCAACACAACCT |
|                 | R           | GTTCCGCAACACCTCCACAT     |
| $\beta$ -tublin | F           | TTGAGCCCTACAACGCCACT     |
|                 | R           | TGGTTCAGGTCACCGTAAGAGG   |
